# Supplementary material for: Nitrogen-decorated, porous carbons derived from waste cow manure as efficient catalysts for the selective capture and conversion of CO2
Source: Royal Society of Chemistry journal article supplement (doi:10.1039/c8ra10497b), 2019-01-01
Supplement: c8ra10497b1.pdf [file c8ra10497b1.pdf]

## Supporting Information

### **Nitrogen Decorated, Porous Carbons Derived from Waste Cow Manure as Efficient Catalysts for Selective Capture and Conversion of CO<sub>2</sub>**

*Weiping Kong\*, Jing Liu*

*School of Teacher Education, Shaoxing University, Shaoxing, Zhejiang Province,  
312000, China. E-mail: kongweiping0111@163.com*

**Table S1** Textural properties and N contents and of CMCs.

| Samples              | $S_{\text{BET}}$ (m <sup>2</sup> /g) <sup>a</sup> | $V_{\text{m}}$ (cm <sup>3</sup> /g) <sup>b</sup> | $V_{\text{t}}$ (cm <sup>3</sup> /g) <sup>c</sup> | $W_{\text{N}}$ (wt.%) <sup>d</sup> |
|----------------------|---------------------------------------------------|--------------------------------------------------|--------------------------------------------------|------------------------------------|
| CMC                  | 60                                                | 0.02                                             | 0.05                                             | 0.74                               |
| CMC-A-1 <sup>e</sup> | 713                                               | 0.19                                             | 0.56                                             | 0.37                               |
| CMC-A-2 <sup>f</sup> | 1106                                              | 0.29                                             | 0.93                                             | 0.39                               |
| CMC-A-2 <sup>g</sup> | 1086                                              | 0.32                                             | 1.12                                             | 0.38                               |

<sup>a</sup> Specific surface area; <sup>b</sup> Micropore volume; <sup>c</sup> Total pore volume; <sup>d</sup> N contents. <sup>e</sup> KOH activation method was widely used to increase porosity<sup>S1</sup>. <sup>f</sup> NaNH<sub>2</sub> activation method was widely used to increase porosity<sup>S2,S3</sup>. <sup>g</sup> Textural properties of CMC-A-2 after 5 recycled times.

**Table S2** CO<sub>2</sub> capacities and CO<sub>2</sub>/N<sub>2</sub> selectivities of CMCs.

| Samples | CO <sub>2</sub> capacities (mmol/g) <sup>a</sup> |       | CO <sub>2</sub> /N <sub>2</sub> selectivities <sup>b</sup> |       |
|---------|--------------------------------------------------|-------|------------------------------------------------------------|-------|
|         | 0 °C                                             | 23 °C | 0 °C                                                       | 23 °C |
| CMC     | 0.50                                             | 0.41  | 14.9                                                       | 21.1  |
| CMC-A-1 | 0.88                                             | 0.63  | 23.7                                                       | 27.5  |
| CMC-A-2 | 1.44                                             | 0.73  | 51.0                                                       | 41.4  |

<sup>a</sup> CO<sub>2</sub> capacities at 0.15 bar; <sup>b</sup> IAST selectivities for a mixture of CO<sub>2</sub> and N<sub>2</sub> (0.15:0.85 v/v) at 1 bar.

**Table S3** Activity of catalysts in the cycloaddition of CO<sub>2</sub> to propylene oxide for the production of propylene carbonate.

| Catalysts                                         | CO <sub>2</sub><br>(MPa) | Co-catalysts                  | Temp.<br>(°C) | Time<br>(h) | Yield<br>(%) | Refs |
|---------------------------------------------------|--------------------------|-------------------------------|---------------|-------------|--------------|------|
| USTC-253-TFA                                      | 0.1                      | <i>n</i> -Bu <sub>4</sub> NBr | 25            | 72          | 81.3         | S4   |
| Co-CMP 100                                        | 0.1                      | <i>n</i> -Bu <sub>4</sub> NBr | 25            | 48          | 81.5         | S5   |
| Zn/HAzo-POP-1                                     | 3.0                      | <i>n</i> -Bu <sub>4</sub> NBr | 100           | 0.5         | 86.0         | S6   |
| Silicon-based<br>imidazolium salts                | poly-<br>1.0             | -                             | 110           | 2           | 94.0         | S7   |
| Chitosan functionalized ionic<br>liquid CS-EMImBr | 2.0                      | -                             | 120           | 4           | 96.0         | S8   |
| Co@R/HMTA-0.30                                    | 1.0                      | <i>n</i> -Bu <sub>4</sub> NBr | 100           | 1.5         | 97.1         | S9   |
| TBB-Bpy@Salen-Co                                  | 1.0                      | -                             | 60            | 6           | 99.2         | S10  |
| Co/POP-TPP                                        | 0.1                      | <i>n</i> -Bu <sub>4</sub> NBr | 29            | 24          | 98.5         | S11  |

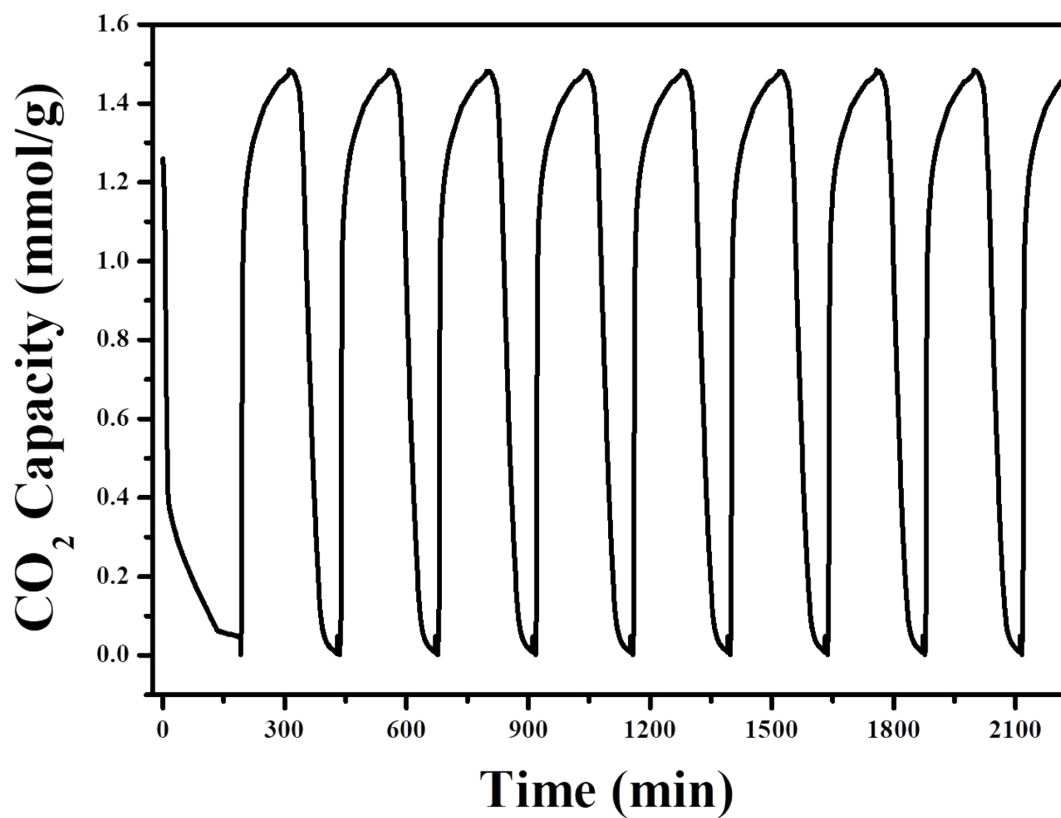

**Figure S1** Cycling property of CMC-A-2 in the capture of CO<sub>2</sub> under dry condition (adsorption conditions: pure CO<sub>2</sub>, 23 °C, 50 mL/min, 180 min; desorption conditions: pure N<sub>2</sub>, 75 °C, 150 mL/min, 120 min).

## Supporting references

- S1. L. K. C. de Souza, N. P. Wickramaratne, A. S. Ello, M. J. F. Costa, C. E. F. Da Costa and M. Jaroniec, *Carbon.*, 2013, **65**, 334–340.
- S2. K. Huang, S. H. Chai, R. T. Mayes, G. M. Veith, K. L. Browning, M. A. Sakwa-Novak, M. E. Potter, C. W. Jones, Y. T. Wu and S. Dai, *Chem. Commun.*, 2015, **51**, 17261–17264.
- S3. K. Huang, S. H. Chai, R. T. Mayes, S. Tan, C. W. Jones and S. Dai, *Micro. Meso. Mater.* 2016, **230**, 100–108.
- S4. Z.-R. Jiang, H. W. Wang, Y. L. Hu, J. L. Lu and H.-L. Jiang, *ChemSusChem.* 2015, **8**, 878–885.
- S5. Y. Xie, T. T. Wang, X. H. Liu, K. Zou and W. Q. Deng, *Nat. Commun.*, 2013, **4**, 1960–1967.
- S6. G. Ji, Z. Z. Yang, H. Y. Zhang, Y. F. Zhao, B. Yu, Z. S. Ma and Z. M. Liu, *Angew. Chem.*, 2016, **128**, 9837–9841.
- S7. J. Q. Wang, J. Leong and Y. G. Zhang, *Green Chem.*, 2014, **16**, 4515–4519.
- S8. J. Sun, J. Q. Wang, W. G. Cheng, J. X. Zhang, X. H. Li, S. J. Zhang and Y. B. She, *Green Chem.*, 2012, **14**, 654–660.
- S9. F. J. Liu, K. Huang, Q. Wu and S. Dai, *Adv. Mater.*, 2017, **29**, 1700445.

- S10. Y. Leng, D. Lu, C. J. Zhang, P. P. Jiang, W. J. Zhang, J. Wang, *Chem. Eur. J.*, 2016, **22**, 8368–8375.
- S11. Z. F. Dai, Q. Sun, X. L. Liu, C. Q. Bian, Q. M. Wu, S. X. Pan, L. Wang, X. J. Meng, F. Deng, F.-S. Xiao, *J. Catal.*, 2016, **338**, 202–209.
